# Supplementary material
Source: PubMed Central journal article supplement (PMC6196328)
Supplement: NIHMS986086-supplement-Movie_S1.pdf [file NIHMS986086-supplement-Movie_S1.pdf]

# Supporting Information for "Orientation and stability of asymmetric magnetic reconnection x-line"

## Contents of this file

1. The information for the movie that is uploaded separately

## Additional Supporting Information (Files uploaded separately)

1. xline.mp4

## Introduction

This movie shows the evolution of the current density in a format similar to Fig. 2(b).

The time  $t$  is normalized to the ion gyro-frequency  $\Omega_{ci}$  defined in the papers.
